# Supplementary material
Source: publisher figshare collection journal article supplement (https://aacr.figshare.com/ndownloader/files/39880240)
Supplement: Supplementary file 1 [file 39880240]

## Sheet: ST1
Table ST1: Summary of growth inhibitory IC50 values
			Neocuproine		Binimetinib		Neo/Bini ratio
	Cell line	Mutation	IC50 values	C.I.(95%)	IC50 values	C.I.(95%)
			(nM)	(nM)	(nM)	(nM)
	NHD fibroblasts	N/A	<10000
	melanocytes	N/A	<10000
	keratinocytes	N/A	<10000
	MM151001	NRAS(Q61R)	60	40-90	3300	1900-6900	0.0181818
	M130219	NRAS(Q61R)	200	170-230	4300	3100-6300	0.0465116
	M050829	NRAS(Q61L)	180	100-310	6300	4200-10400	0.0285714
	M130227	NRAS(Q61R)	146	100-200	1500	1200-1900	0.0973333
	MM070221	NRAS(Q61R)	1190	990-1500	<10000		0.119
	M130926	NRAS(Q61R)	1100	800-1700	2200	1800-2700	0.5
	M131205	NRAS(Q61R)	570	470-700	<10000		0.057
	M160915	NRAS(Q61R)	430	350-530	<10000		0.043
	M130405	NRAS(Q61R)	4500	1900-10000	170	120-2220	26.4706
	MM141204	NRAS(Q61K)	600	260-1270	2	0.7-3.2	300
	M130429	NRAS(Q61R)	1300	930-1800	60	50-70	21.6667
	M130830	NRAS(Q61K)	1000	720-1500	10	6-17	100
	M130515	NRAS(Q61R)	1600	1000-2700	60	50-65	26.6667
	M130421	NRAS(Q61R)	<10000	1100-2900	80	50-110	125
	M130425	NRAS(Q61R)	2600	1600-4800	90	60-120	28.8889
	M010817	NRAS(Q61R)	2900	1800-5100	70	50-90	41.4286
	M121224	BRAF(V600E)/NRAS(Q61K)	340	270-430	170	120-230	2
	Summary of growth inhibitory IC50 values (including the corresponding 95% confident intervals (C.I.95%) conducted for neocuproine or MEKi (binimetinib) and primary human cell lines. The table includes the confirmed oncogenic mutation as well as the ratio of neocuproine normalized to the MEKi response.
